# Supplementary material for: Evolution of asexual Daphnia pulex in Japan: variations and covariations of the digestive, morphological and life history traits
Source: PubMed Central journal article supplement (PMC6567566; doi:10.1186/s12862-019-1453-9), 2019-06-13
Supplement: 12862_2019_1453_MOESM1_ESM.pdf [file 12862_2019_1453_MOESM1_ESM.pdf]

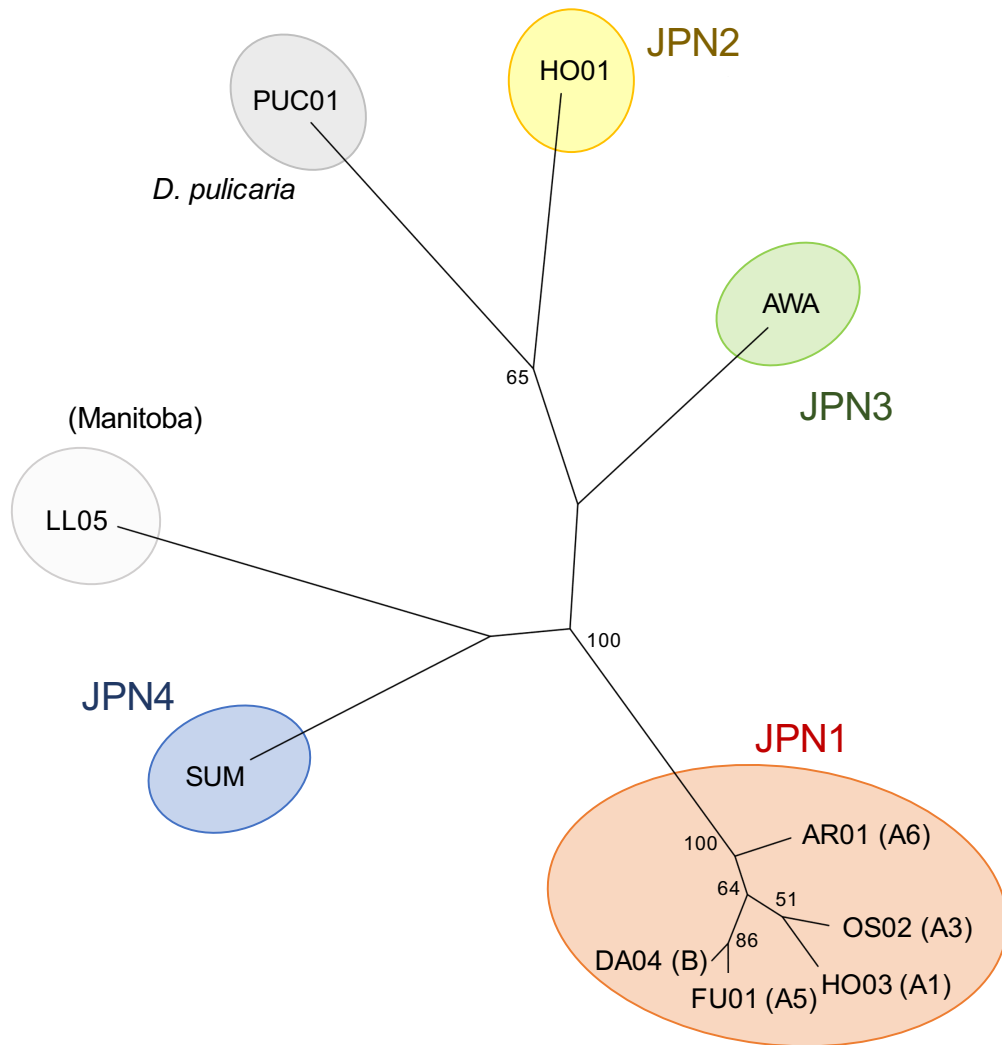

**Figure S1.** Phylogenetic relationships of five clones in JPN1 and other clones. This is based on 5282 SNPs from whole genome sequence data. Using data with quality scores higher than 20, a phylogenetic tree of the clones by the maximum likelihood (ML) method were constructed using SNPhylo pipeline [82]. Numbers on branches indicate bootstrap values (>50% are shown). In this analysis, we included genotypes used in So et al. [7] other than *D. pulex* JPN1 clones. These are *D. pulex* JPN2 (HO01), JPN3 (AWA) and JPN4 (SUM) and a genotype of *D. pulex* (LL05) collected from a small lake in Manitoba, Canada, and *D. pulicaria* (PUC01) collected from Lake Biwa.
