# Supplementary material for: Evolution of asexual Daphnia pulex in Japan: variations and covariations of the digestive, morphological and life history traits
Source: PubMed Central journal article supplement (PMC6567566; doi:10.1186/s12862-019-1453-9), 2019-06-13
Supplement: 12862_2019_1453_MOESM2_ESM.pdf [file 12862_2019_1453_MOESM2_ESM.pdf]

**Table S1.** Genetic distance measured by proportion of different sites (p-distance) among *Daphnia pulex* JPN1 clones (A1, A3, A5, A6 and B).

| Clone | A3        | A5        | A6        | B         |
|-------|-----------|-----------|-----------|-----------|
| A1    | 1.75.E-03 | 1.66.E-03 | 1.85.E-03 | 1.72.E-03 |
| A3    |           | 1.70.E-03 | 1.88.E-03 | 1.73.E-03 |
| A5    |           |           | 1.92.E-03 | 1.41.E-03 |
| A6    |           |           |           | 1.91.E-03 |
