# Supplementary material for: Evolution of asexual Daphnia pulex in Japan: variations and covariations of the digestive, morphological and life history traits
Source: PubMed Central journal article supplement (PMC6567566; doi:10.1186/s12862-019-1453-9), 2019-06-13
Supplement: 12862_2019_1453_MOESM3_ESM.pdf [file 12862_2019_1453_MOESM3_ESM.pdf]

**Table S2.** Distances of phenotypes in each category among *Daphnia pulex* JPN1 clones (A1, A3, A5, A6 and B). The phenotypic distance was calculated using difference in BLUPs between clones.

| Trait type   | Clone | 2.0 mg C L <sup>-1</sup> |      |      |      | 0.2 mg C L <sup>-1</sup> |      |      |      | Combined |      |      |      |
|--------------|-------|--------------------------|------|------|------|--------------------------|------|------|------|----------|------|------|------|
|              |       | A3                       | A5   | A6   | B    | A3                       | A5   | A6   | B    | A3       | A5   | A6   | B    |
| Digestive    | A1    | 3.25                     | 3.24 | 3.54 | 4.03 | 3.27                     | 2.46 | 1.93 | 4.28 | 3.07     | 2.19 | 2.34 | 4.22 |
|              | A3    |                          | 2.13 | 0.97 | 1.52 |                          | 2.56 | 2.35 | 3.35 |          | 2.20 | 2.10 | 3.43 |
|              | A5    |                          |      | 2.44 | 3.20 |                          |      | 1.77 | 2.11 |          |      | 2.16 | 2.52 |
|              | A6    |                          |      |      | 1.08 |                          |      |      | 3.10 |          |      |      | 3.24 |
| Life history | A1    | 1.66                     | 2.17 | 1.51 | 3.76 | 2.42                     | 2.90 | 3.29 | 4.19 | 1.25     | 2.96 | 2.60 | 4.40 |
|              | A3    |                          | 1.32 | 0.79 | 4.40 |                          | 2.41 | 2.58 | 3.34 |          | 2.07 | 1.53 | 4.36 |
|              | A5    |                          |      | 1.44 | 4.33 |                          |      | 2.03 | 2.86 |          |      | 1.75 | 4.06 |
|              | A6    |                          |      |      | 4.57 |                          |      |      | 4.64 |          |      |      | 4.90 |
| Morphology   | A1    | 3.81                     | 3.60 | 4.24 | 4.36 | 3.68                     | 3.26 | 4.87 | 4.60 | 4.12     | 4.14 | 5.14 | 4.79 |
|              | A3    |                          | 1.31 | 2.94 | 2.97 |                          | 1.15 | 2.16 | 2.19 |          | 0.73 | 1.30 | 2.30 |
|              | A5    |                          |      | 1.98 | 2.38 |                          |      | 2.30 | 2.70 |          |      | 1.39 | 2.61 |
|              | A6    |                          |      |      | 2.85 |                          |      |      | 2.76 |          |      |      | 2.63 |
| All          | A1    | 5.28                     | 5.31 | 5.73 | 7.03 | 5.63                     | 5.17 | 6.31 | 7.66 | 5.28     | 5.54 | 6.21 | 7.75 |
|              | A3    |                          | 2.72 | 3.43 | 5.47 |                          | 3.72 | 4.12 | 5.22 |          | 3.15 | 3.11 | 6.11 |
|              | A5    |                          |      | 3.46 | 5.89 |                          |      | 3.56 | 4.48 |          |      | 3.11 | 5.45 |
|              | A6    |                          |      |      | 5.49 |                          |      |      | 6.22 |          |      |      | 6.44 |
