# Supplementary material for: Evolution of asexual Daphnia pulex in Japan: variations and covariations of the digestive, morphological and life history traits
Source: PubMed Central journal article supplement (PMC6567566; doi:10.1186/s12862-019-1453-9), 2019-06-13
Supplement: 12862_2019_1453_MOESM4_ESM.pdf [file 12862_2019_1453_MOESM4_ESM.pdf]

**Table S3.** Distance of single phenotypes among *Daphnia pulex* JPN1 clones (A1, A3, A5, A6 and B). The phenotypic distance was calculated using difference in BLUPs between clones.

| Trait                                                | Clone | 2.0 mg C L <sup>-1</sup> |        |        |        | 0.2 mg C L <sup>-1</sup> |        |        |        | Mixture |        |        |        |
|------------------------------------------------------|-------|--------------------------|--------|--------|--------|--------------------------|--------|--------|--------|---------|--------|--------|--------|
|                                                      |       | A3                       | A5     | A6     | B      | A3                       | A5     | A6     | B      | A3      | A5     | A6     | B      |
| Beta-glucosidase                                     | A1    | 144.59                   | 102.49 | 128.61 | 124.11 | 123.43                   | 15.31  | 10.53  | 28.29  | 73.98   | 20.15  | 28.19  | 21.52  |
|                                                      | A3    |                          | 42.10  | 15.98  | 20.48  |                          | 138.74 | 133.96 | 151.72 |         | 53.83  | 45.79  | 52.46  |
|                                                      | A5    |                          |        | 26.13  | 21.62  |                          |        | 4.78   | 12.98  |         |        | 8.04   | 1.37   |
|                                                      | A6    |                          |        |        | 4.51   |                          |        |        | 17.76  |         |        |        | 6.67   |
| Lipase                                               | A1    | -                        | -      | -      | -      | 175.10                   | 180.60 | 274.78 | 59.92  | 101.77  | 92.10  | 113.83 | 2.67   |
|                                                      | A3    |                          | -      | -      | -      |                          | 5.49   | 99.67  | 115.18 |         | 9.67   | 12.06  | 104.44 |
|                                                      | A5    |                          |        | -      | -      |                          |        | 94.18  | 120.68 |         |        | 21.73  | 94.77  |
|                                                      | A6    |                          |        |        | -      |                          |        |        | 214.85 |         |        |        | 116.50 |
| Alkaline phosphatase                                 | A1    | 16.93                    | 55.86  | 22.51  | 65.96  | 106.72                   | 273.04 | 2.34   | 716.08 | 26.35   | 35.13  | 7.30   | 163.17 |
|                                                      | A3    |                          | 72.79  | 5.58   | 49.03  |                          | 166.32 | 109.06 | 609.36 | 0.00    | 8.78   | 19.05  | 136.82 |
|                                                      | A5    |                          |        | 78.37  | 121.82 |                          |        | 275.38 | 443.04 | 8.78    | 0.00   | 27.84  | 128.04 |
|                                                      | A6    |                          |        |        | 43.45  |                          |        |        | 718.42 | 19.05   | 27.84  | 0.00   | 155.88 |
| Arginine amino-peptidase                             | A1    | 23.98                    | 37.63  | 28.14  | 38.11  | 43.06                    | 112.85 | 30.18  | 149.72 | 17.00   | 37.82  | 0.22   | 47.15  |
|                                                      | A3    |                          | 13.65  | 4.16   | 14.13  |                          | 69.79  | 73.24  | 106.65 |         | 20.81  | 17.22  | 30.15  |
|                                                      | A5    |                          |        | 9.48   | 0.48   |                          |        | 143.03 | 36.87  |         |        | 38.03  | 9.33   |
|                                                      | A6    |                          |        |        | 9.97   |                          |        |        | 179.90 |         |        |        | 47.36  |
| Alanine amino-peptidase                              | A1    | 16.96                    | 12.86  | 47.15  | 47.06  | 43.16                    | 36.63  | 58.65  | 82.46  | 32.19   | 26.75  | 58.39  | 70.83  |
|                                                      | A3    |                          | 4.11   | 30.19  | 30.10  |                          | 6.53   | 15.49  | 39.30  |         | 5.44   | 26.19  | 38.63  |
|                                                      | A5    |                          |        | 34.30  | 34.20  |                          |        |        | 22.02  |         |        | 31.64  | 44.08  |
|                                                      | A6    |                          |        |        | 0.09   |                          |        |        | 23.81  |         |        |        | 12.44  |
| Maturation age                                       | A1    | 0.29                     | 0.1    | 0.03   | 1.39   | 0.12                     | 0.28   | 0.2    | 1.14   | 0.23    | 0.26   | 0.14   | 1.47   |
|                                                      | A3    |                          | 0.19   | 0.32   | 1.1    |                          | 0.17   | 0.32   | 1.02   |         | 0.03   | 0.37   | 1.24   |
|                                                      | A5    |                          |        | 0.13   | 1.29   |                          |        | 0.48   | 0.86   |         |        | 0.4    | 1.2    |
|                                                      | A6    |                          |        |        | 1.42   |                          |        |        | 1.34   |         |        |        | 1.61   |
| Maturation instar number                             | A1    | 0.07                     | 0.05   | 0.05   | 0.39   | 0.24                     | 0.25   | 0.33   | 0.65   | 0.09    | 0.18   | 0.15   | 0.65   |
|                                                      | A3    |                          | 0.03   | 0.03   | 0.31   |                          | 0.49   | 0.09   | 0.89   |         | 0.27   | 0.06   | 0.74   |
|                                                      | A5    |                          |        | 0.00   | 0.34   |                          |        | 0.58   | 0.4    |         |        | 0.33   | 0.46   |
|                                                      | A6    |                          |        |        | 0.34   |                          |        |        | 0.98   |         |        |        | 0.79   |
| Maturation body length                               | A1    | 0.05                     | 0.05   | 0.07   | 0.06   | 0.04                     | 0.07   | 0.12   | 0.01   | 0.05    | 0.08   | 0.12   | 0.03   |
|                                                      | A3    |                          | 0.0007 | 0.02   | 0.11   |                          | 0.03   | 0.08   | 0.03   |         | 0.02   | 0.06   | 0.08   |
|                                                      | A5    |                          |        | 0.02   | 0.11   |                          |        | 0.05   | 0.06   |         |        | 0.04   | 0.1    |
|                                                      | A6    |                          |        |        | 0.13   |                          |        |        | 0.11   |         |        |        | 0.14   |
| Intermoult duration before maturation                | A1    | 0.00                     | 0.00   | 0.00   | 0.00   | 0.09                     | 0.07   | 0.04   | 0.02   | 0.02    | 0.01   | 0.01   | 0.01   |
|                                                      | A3    |                          | 0.00   | 0.00   | 0.00   |                          | 0.16   | 0.05   | 0.07   |         | 0.03   | 0.01   | 0.01   |
|                                                      | A5    |                          |        | 0.00   | 0.00   |                          |        | 0.11   | 0.09   |         |        | 0.02   | 0.02   |
|                                                      | A6    |                          |        |        | 0.00   |                          |        |        | 0.01   |         |        |        | 0.001  |
| Intermoult duration after maturation                 | A1    | 0.04                     | 0.01   | 0.04   | 0.001  | 0.1                      | 0.14   | 0.12   | 0.1    | -       | -      | -      | -      |
|                                                      | A3    |                          | 0.05   | 0.08   | 0.04   |                          | 0.04   | 0.02   | 0.0006 |         | -      | -      | -      |
|                                                      | A5    |                          |        | 0.03   | 0.01   |                          |        | 0.01   | 0.04   |         |        | -      | -      |
|                                                      | A6    |                          |        |        | 0.04   |                          |        |        | 0.02   |         |        |        | -      |
| <i>k</i>                                             | A1    | 0.0022                   | 0.0072 | 0.0009 | 0.0177 | 0.0161                   | 0.0384 | 0.0329 | 0.0376 | 0.0061  | 0.0223 | 0.0149 | 0.0276 |
|                                                      | A3    |                          | 0.0094 | 0.0012 | 0.0198 |                          | 0.0224 | 0.0168 | 0.0215 |         | 0.0163 | 0.0089 | 0.0216 |
|                                                      | A5    |                          |        | 0.0081 | 0.0105 |                          |        | 0.0055 | 0.0008 |         |        | 0.0074 | 0.0053 |
|                                                      | A6    |                          |        |        | 0.0186 |                          |        |        | 0.0047 |         |        |        | 0.0127 |
| Mean egg number of the first three clutches          | A1    | 1.72                     | 2.46   | 1.07   | 1.25   | 0.85                     | 0.24   | 0.16   | 0.96   | 0.11    | 0.37   | 0.14   | 0.43   |
|                                                      | A3    |                          | 0.74   | 0.66   | 2.98   |                          | 0.61   | 0.69   | 0.11   |         | 0.26   | 0.03   | 0.54   |
|                                                      | A5    |                          |        | 1.4    | 3.72   |                          |        | 0.08   | 0.72   |         |        | 0.23   | 0.8    |
|                                                      | A6    |                          |        |        | 2.32   |                          |        |        | 0.8    |         |        |        | 0.57   |
| Mean neonate size of the first three clutches        | A1    | 0.0063                   | 0.0044 | 0.0008 | 0.0033 | 0.079                    | 0.1079 | 0.1317 | 0.0821 | 0.005   | 0.0058 | 0.0058 | 0.0044 |
|                                                      | A3    |                          | 0.0019 | 0.0071 | 0.003  |                          | 0.0289 | 0.0528 | 0.0031 |         | 0.0008 | 0.0008 | 0.0006 |
|                                                      | A5    |                          |        | 0.0052 | 0.001  |                          |        | 0.0238 | 0.0258 |         |        | 2E-06  | 0.0013 |
|                                                      | A6    |                          |        |        | 0.0041 |                          |        |        | 0.0496 |         |        |        | 0.0014 |
| Body length at five days                             | A1    | 0.27                     | 0.27   | 0.32   | 0.31   | 0.20                     | 0.12   | 0.27   | 0.21   | 0.25    | 0.21   | 0.32   | 0.28   |
|                                                      | A3    |                          | 0.01   | 0.06   | 0.05   |                          | 0.04   | 0.04   | 0.03   |         | 0.04   | 0.07   | 0.03   |
|                                                      | A5    |                          |        | 0.05   | 0.04   |                          |        | 0.16   | 0.10   |         |        | 0.11   | 0.07   |
|                                                      | A6    |                          |        |        | 0.01   |                          |        |        | 0.06   |         |        |        | 0.04   |
| Body weight at five days                             | A1    | 0.003                    | 0.01   | 0.01   | 0.01   | 0.003                    | 0.003  | 0.01   | 0.01   | 0.003   | 0.01   | 0.01   | 0.01   |
|                                                      | A3    |                          | 0.005  | 0.007  | 0.009  |                          | 0.0004 | 0.005  | 0.003  |         | 0.002  | 0.006  | 0.006  |
|                                                      | A5    |                          |        | 0.002  | 0.005  |                          |        | 0.005  | 0.004  |         |        | 0.004  | 0.004  |
|                                                      | A6    |                          |        |        | 0.002  |                          |        |        | 0.001  |         |        |        | 0.0003 |
| Relative tail spine length of the first adult instar | A1    | 0.08                     | 0.07   | 0.09   | 0.09   | 0.07                     | 0.06   | 0.05   | 0.06   | 0.08    | 0.06   | 0.07   | 0.08   |
|                                                      | A3    |                          | 0.02   | 0.01   | 0.01   |                          | 0.02   | 0.02   | 0.01   |         | 0.02   | 0.004  | 0.0008 |
|                                                      | A5    |                          |        | 0.03   | 0.02   |                          |        | 0.002  | 0.01   |         |        | 0.01   | 0.01   |
|                                                      | A6    |                          |        |        | 0.003  |                          |        |        | 0.01   |         |        |        | 0.003  |
| <i>L<sub>∞</sub></i>                                 | A1    | 0.18                     | 0.2    | 0.27   | 0.17   | 0.01                     | 0.004  | 0.01   | 0.09   | 0.06    | 0.07   | 0.1    | 0.12   |
|                                                      | A3    |                          | 0.02   | 0.08   | 0.35   |                          | 0.01   | 0.02   | 0.07   |         | 0.02   | 0.05   | 0.18   |
|                                                      | A5    |                          |        | 0.07   | 0.37   |                          |        | 0.01   | 0.09   |         |        | 0.03   | 0.2    |
|                                                      | A6    |                          |        |        | 0.44   |                          |        |        | 0.1    |         |        |        | 0.23   |
