# Supplementary material for: Evolution of asexual Daphnia pulex in Japan: variations and covariations of the digestive, morphological and life history traits
Source: PubMed Central journal article supplement (PMC6567566; doi:10.1186/s12862-019-1453-9), 2019-06-13
Supplement: 12862_2019_1453_MOESM5_ESM.pdf [file 12862_2019_1453_MOESM5_ESM.pdf]

**Table S4.** Relationship between genetic distance and phenotypic distance between clones in each of the single traits.

| Trait                                            |          | 2.0 mg C L <sup>-1</sup> | 0.2 mg C L <sup>-1</sup> | Combined |
|--------------------------------------------------|----------|--------------------------|--------------------------|----------|
| Digestive                                        |          |                          |                          |          |
| Beta-glucosidase                                 | <i>r</i> | -0.06                    | 0.05                     | 0.12     |
|                                                  | <i>p</i> | 0.52                     | 0.32                     | 0.30     |
| Lipase                                           | <i>r</i> | -                        | 0.23                     | -0.15    |
|                                                  | <i>p</i> | -                        | 0.28                     | 0.64     |
| Alkaline phosphatase                             | <i>r</i> | -0.67                    | -0.15                    | -0.28    |
|                                                  | <i>p</i> | 0.96                     | 0.59                     | 0.63     |
| Arginine amino-peptidase                         | <i>r</i> | 0.02                     | 0.41                     | 0.26     |
|                                                  | <i>p</i> | 0.37                     | 0.07                     | 0.15     |
| Alanine amino-peptidase                          | <i>r</i> | -0.05                    | -0.27                    | -0.18    |
|                                                  | <i>p</i> | 0.55                     | 0.73                     | 0.66     |
| Life history                                     |          |                          |                          |          |
| Maturation age                                   | <i>r</i> | -0.32                    | -0.07                    | -0.18    |
|                                                  | <i>p</i> | 0.64                     | 0.49                     | 0.62     |
| Maturation instar number                         | <i>r</i> | -0.38                    | 0.16                     | -0.08    |
|                                                  | <i>p</i> | 0.80                     | 0.31                     | 0.52     |
| Maturation body length                           | <i>r</i> | -0.28                    | 0.33                     | 0.03     |
|                                                  | <i>p</i> | 0.76                     | 0.18                     | 0.51     |
| Intermoult duration before maturation            | <i>r</i> | -0.19                    | -0.31                    | -0.37    |
|                                                  | <i>p</i> | 0.70                     | 0.75                     | 0.79     |
| Intermoult duration after maturation             | <i>r</i> | 0.56                     | -0.14                    | -        |
|                                                  | <i>p</i> | 0.15                     | 0.59                     | -        |
| <i>k</i>                                         | <i>r</i> | -0.14                    | 0.01                     | -0.04    |
|                                                  | <i>p</i> | 0.58                     | 0.36                     | 0.54     |
| Mean egg number of the first three clutches      | <i>r</i> | -0.63                    | -0.22                    | -0.63    |
|                                                  | <i>p</i> | 0.98                     | 0.74                     | 0.92     |
| Morphology                                       |          |                          |                          |          |
| Mean neonate size of the first three clutches    | <i>r</i> | 0.49                     | 0.14                     | -0.11    |
|                                                  | <i>p</i> | 0.05                     | 0.32                     | 0.56     |
| Body length at five days                         | <i>r</i> | -0.02                    | 0.15                     | 0.05     |
|                                                  | <i>p</i> | 0.44                     | 0.35                     | 0.36     |
| Body weight at five days                         | <i>r</i> | -0.11                    | 0.22                     | -0.03    |
|                                                  | <i>p</i> | 0.62                     | 0.28                     | 0.57     |
| Relative tail spine length of the first adult in | <i>r</i> | -0.06                    | -0.05                    | -0.09    |
|                                                  | <i>p</i> | 0.52                     | 0.49                     | 0.54     |
| <i>L<sub>∞</sub></i>                             | <i>r</i> | -0.24                    | -0.29                    | -0.27    |
|                                                  | <i>p</i> | 0.74                     | 0.61                     | 0.73     |
