# Supplementary material for: Evolution of asexual Daphnia pulex in Japan: variations and covariations of the digestive, morphological and life history traits
Source: PubMed Central journal article supplement (PMC6567566; doi:10.1186/s12862-019-1453-9), 2019-06-13
Supplement: 12862_2019_1453_MOESM6_ESM.pdf [file 12862_2019_1453_MOESM6_ESM.pdf]

**Table S5.** BLUPs of each trait in *Daphnia pulex* JPN 1 clones.

| Food concentration | Clone | Beta-glucosidase | Lipase  | Alkaline Phosphatase | Arginine aminopeptidase | Alanine aminopeptidase | Maturation age | Maturation instar number | Maturation body length | Intermoult duration before maturation | Intermoult duration after maturation | <i>k</i> | Mean egg number of the first three clutches | Mean neonate size of the first three clutches | Body length at five days | Body weight at five days | Relative tail spine length of the first adult instar | $L_{\infty}$ |
|--------------------|-------|------------------|---------|----------------------|-------------------------|------------------------|----------------|--------------------------|------------------------|---------------------------------------|--------------------------------------|----------|---------------------------------------------|-----------------------------------------------|--------------------------|--------------------------|------------------------------------------------------|--------------|
| 2.0 mg C l         | A1    | 99.96            | 0.00    | 9.91                 | 25.57                   | 24.81                  | 0.35           | 0.11                     | -0.02                  | 1.26E-16                              | 0.004                                | -0.00435 | -0.8                                        | -0.00263                                      | -0.2345                  | -0.00674                 | -0.066                                               | -0.1         |
|                    | A3    | -44.63           | 0.00    | -7.02                | 1.59                    | 7.84                   | 0.06           | 0.04                     | 0.03                   | -1.58E-16                             | 0.04                                 | -0.00652 | 0.92                                        | 0.00365                                       | 0.031306                 | -0.00353                 | 0.017                                                | 0.09         |
|                    | A5    | -2.53            | 0.00    | 65.77                | -12.06                  | 11.95                  | 0.25           | 0.06                     | 0.03                   | 6.84E-17                              | -0.008                               | 0.00285  | 1.66                                        | 0.001719                                      | 0.03734                  | 0.001138                 | 0.001                                                | 0.1          |
|                    | A6    | -28.65           | 0.00    | -12.60               | -2.57                   | -22.35                 | 0.38           | 0.06                     | 0.05                   | 6.84E-17                              | -0.038                               | -0.00528 | 0.27                                        | -0.00343                                      | 0.087577                 | 0.003487                 | 0.026                                                | 0.17         |
|                    | B     | -24.15           | 0.00    | -56.05               | -12.54                  | -22.25                 | -1.04          | -0.28                    | -0.08                  | -1.05E-16                             | 0.002                                | 0.013304 | -2.05                                       | 0.000696                                      | 0.078273                 | 0.005653                 | 0.023                                                | -0.27        |
| 0.2 mg C l         | A1    | 13.86            | 138.08  | 218.70               | 55.09                   | 44.18                  | 0.27           | 0.06                     | -0.05                  | 0.02                                  | -0.09                                | -0.02499 | 0.44                                        | -0.08016                                      | -0.15982                 | -0.00384                 | -0.049                                               | 0.02         |
|                    | A3    | -109.57          | -37.02  | 111.98               | 12.03                   | 1.02                   | 0.15           | 0.31                     | -0.01                  | -0.07                                 | 0.01                                 | -0.00893 | -0.41                                       | -0.00117                                      | 0.038599                 | -0.00092                 | 0.022                                                | 0.01         |
|                    | A5    | 29.17            | -42.52  | -54.34               | -57.76                  | 7.55                   | -0.01          | -0.18                    | 0.02                   | 0.08                                  | 0.04                                 | 0.013427 | 0.2                                         | 0.027777                                      | -0.04346                 | -0.00127                 | 0.007                                                | 0.02         |
|                    | A6    | 24.39            | -136.70 | 221.04               | 85.27                   | -14.47                 | 0.47           | 0.39                     | 0.07                   | -0.02                                 | 0.03                                 | 0.007885 | 0.28                                        | 0.051587                                      | 0.112982                 | 0.003746                 | 0.005                                                | 0.03         |
|                    | B     | 42.15            | 78.16   | -497.38              | -94.63                  | -38.28                 | -0.87          | -0.58                    | -0.04                  | -0.01                                 | 0.01                                 | 0.012606 | -0.52                                       | 0.001967                                      | 0.051698                 | 0.002288                 | 0.015                                                | -0.07        |
| Combined           | A1    | 28.77            | 61.01   | 46.39                | 20.35                   | 37.63                  | 0.36           | 0.12                     | -0.04                  | 0.004                                 | 0                                    | -0.01419 | -0.04                                       | -0.0042                                       | -0.20913                 | -0.0054                  | -0.057                                               | -0.02        |
|                    | A3    | -45.21           | -40.77  | 20.04                | 3.35                    | 5.44                   | 0.14           | 0.21                     | 0.01                   | -0.013                                | 0                                    | -0.00813 | 0.07                                        | 0.000804                                      | 0.038016                 | -0.00221                 | 0.019                                                | 0.03         |
|                    | A5    | 8.61             | -31.09  | 11.26                | -17.47                  | 10.88                  | 0.1            | -0.07                    | 0.03                   | 0.014                                 | 0                                    | 0.008132 | 0.33                                        | 0.001582                                      | -0.00389                 | -8.60E-05                | 0.004                                                | 0.05         |
|                    | A6    | 0.58             | -52.82  | 39.09                | 20.57                   | -20.75                 | 0.5            | 0.26                     | 0.07                   | -0.002                                | 0                                    | 0.00072  | 0.1                                         | 0.001584                                      | 0.106485                 | 0.003703                 | 0.015                                                | 0.08         |
|                    | B     | 7.25             | 63.67   | -116.78              | -26.80                  | -33.20                 | -1.1           | -0.53                    | -0.07                  | -0.003                                | 0                                    | 0.013465 | -0.47                                       | 0.000234                                      | 0.068525                 | 0.003997                 | 0.019                                                | -0.15        |
